# Supplementary material for: Characterization of the SAM domain of the PKD-related protein ANKS6 and its interaction with ANKS3
Source: PubMed Central journal article supplement (PMC4105859; doi:10.1186/1472-6807-14-17), 2014-07-07
Supplement: 1472-6807-14-17-S1.pdf [file 1472-6807-14-17-S1.pdf]

| <b>Human SAM-domain containing protein</b> | <b>UNIPROT ID</b> | <b>Residues</b> |
|--------------------------------------------|-------------------|-----------------|
| AIDA1C/ANKS1B/ cajalin- 2SAMs              | Q7Z6G8            | 808-950         |
| ANKS1A/ odin- 2SAMs                        | Q92625            | 692-836         |
| ANKS6                                      | Q68DC2            | 771-840         |
| ARAP1/CentaurinD2                          | Q96P48            | 1-70            |
| ARAP2/Centaurin D1                         | Q8WZ64            | 1-71            |
| BAR                                        | Q9NZS9            | 177-252         |
| C14orf174                                  | Q9P1V8            | 541-610         |
| CNKSR2                                     | Q8WXI2            | 1-77            |
| CNKSR3                                     | Q6P9H4            | 1-73            |
| DDHD-containing 2                          | O94830            | 382-449         |
| ELF3                                       | P78545            | 48-135          |
| ELF5                                       | Q9UKW6            | 44-129          |
| EPHA2                                      | P29317            | 899-970         |
| EPHA5                                      | P54756            | 960-1030        |
| EPHA6                                      | Q9UF33            | 956-1023        |
| EPHA7                                      | Q15375            | 919-998         |
| EPHB1                                      | P54762            | 906-984         |
| EPHB2                                      | P29323            | 906-985         |
| EPHB6                                      | O15197            | 945-1021        |
| ESE3                                       | Q9NZC4            | 41-120          |
| ETS1                                       | P14921            | 53-136          |
| GA-binding protein/GABPA                   | Q06546            | 170-251         |
| INPPL1                                     | O15357            | 194-1258        |
| LRSAM1                                     | Q6UWE0            | 564-634         |
| MOB                                        | Q86VZ5            | 7-78            |
| Neurabin-1                                 | Q9ULJ8            | 983-1054        |
| SAMD12                                     | Q8N8I0            | 71-145          |
| SAMD4B                                     | Q5PRF9            | 296-361         |
| SAMHD1                                     | Q9Y3Z3            | 1-111           |
| SAMSN1                                     | Q9NSI8            | 237-306         |
| SASH1-SAM1                                 | O94885            | 625-699         |
| SASH1-SAM2                                 | O94885            | 1173-1247       |
| SASH3                                      | O75995            | 247-318         |
| SEC23-interacting protein/SEC23IP          | Q9Y6Y8            | 642-703         |
| SLP76/LCP2                                 | Q13094            | 10-80           |
| Smaug/SAMD4A                               | Q9UPU9            | 320-383         |
| StarD13-deletion                           | Q9Y3MB            | 154-241         |
| STIM2                                      | Q9P246            | 129-205         |
| TP63                                       | Q9H3D4            | 541-609         |
| Usher1G-optimized                          | Q495M9            | 381-461         |
| WDSUB1                                     | Q8N9V3            | 329-396         |
