# Supplementary material for: Characterization of the SAM domain of the PKD-related protein ANKS6 and its interaction with ANKS3
Source: PubMed Central journal article supplement (PMC4105859; doi:10.1186/1472-6807-14-17), 2014-07-07

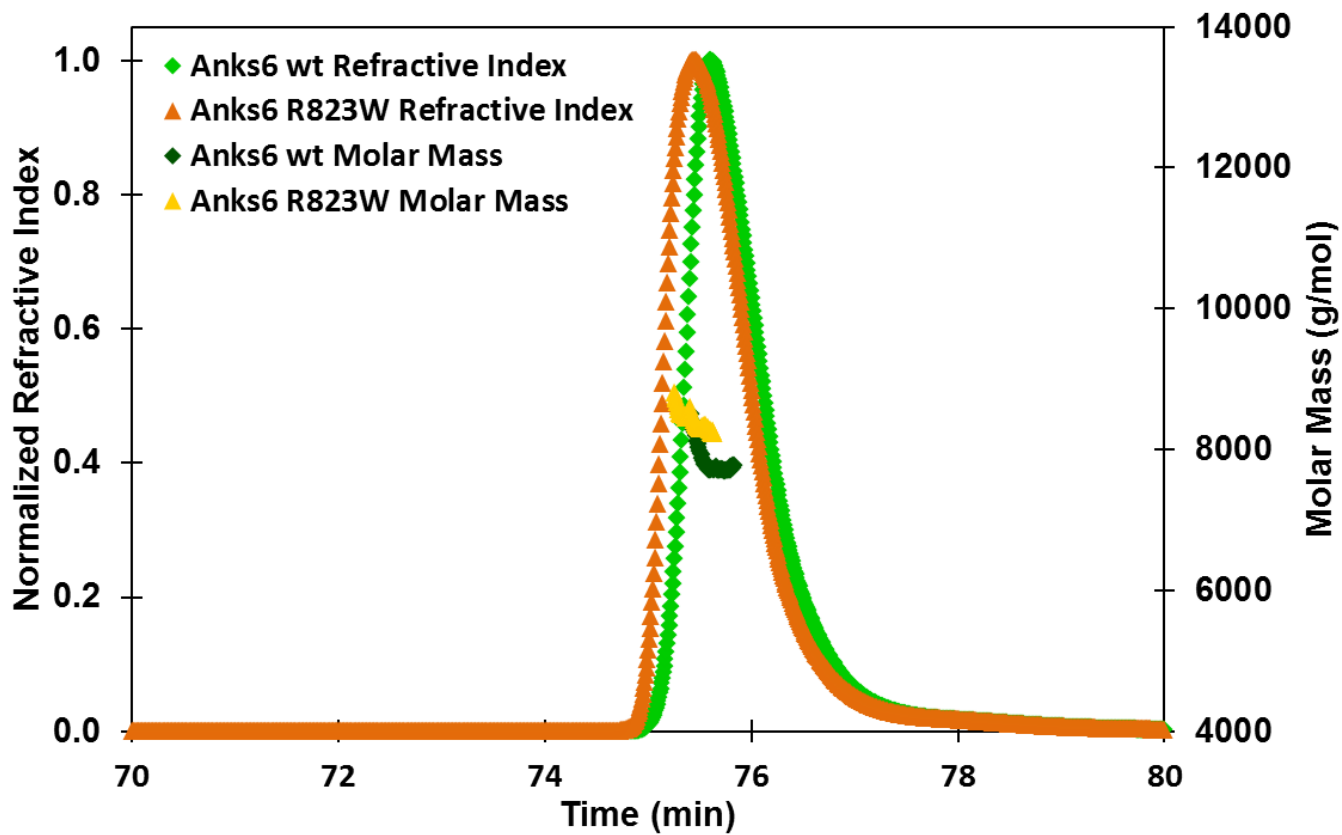

Supplement: 1472-6807-14-17-S3.pdf [file 1472-6807-14-17-S3.pdf]
